# Supplementary material
Source: publisher figshare collection journal article supplement (https://acs.figshare.com/ndownloader/files/8413250)
Supplement: Supplementary file 1 [file 8413250]

## Supporting Information

### Mechanism and Kinetics for Reaction of the Chemical Warfare Agent Simulant, DMMP(g), with Zirconium (IV) MOFs: An Ultrahigh-vacuum and DFT Study

G. Wang,<sup>1</sup> C. Sharp,<sup>1</sup> A. M. Plonka,<sup>2</sup> Q. Wang,<sup>2</sup> A. Frenkel,<sup>2</sup> W. Guo,<sup>3</sup> C. Hill,<sup>3</sup> C. Smith,<sup>1</sup> J. Kollar,<sup>4</sup> D. Troya,<sup>1</sup> and J. R. Morris<sup>1,\*</sup>

<sup>1</sup>*Department of Chemistry, Virginia Tech, Blacksburg, Virginia 24061, United States*

<sup>2</sup>*Department of Materials Science and Chemical Engineering, Stony Brook University, Stony Brook, New York 11794, United States*

<sup>3</sup>*Department of Chemistry, Emory University, Atlanta, Georgia 30322, United States*

<sup>4</sup>*Department of Chemistry and Biochemistry, Kennesaw State University, Kennesaw, Georgia 30144, United States*

#### Corresponding Author

\*jrmorris@vt.edu

#### Table of Contents

Section S1: Powder x-ray diffractograms of UiO-66, UiO-67, and MOF-808

Section S2: Infrared band assignment for peaks in difference IR spectra of UiO-66, UiO-67, and MOF-808 upon DMMP exposure

Section S3: DFT calculations to accompany DMMP-Zr<sub>6</sub> MOF overall reaction pathway calculations

### Section S1: Powder x-ray diffractograms of UiO-66, UiO-67, and MOF-808

The powder XRD measurements were performed with synchrotron X-rays at the 17-BM beam line at the Advanced Photon Source (APS) at Argonne National Laboratory with the fast and large 2D detector, using the beam of  $\lambda=0.72959$  Å and were analyzed using GSAS-II software. The PXRD patterns of UiO-66, UiO-67 and MOF-808 are consistent with those of the ideal structures, as verified by comparison to models.

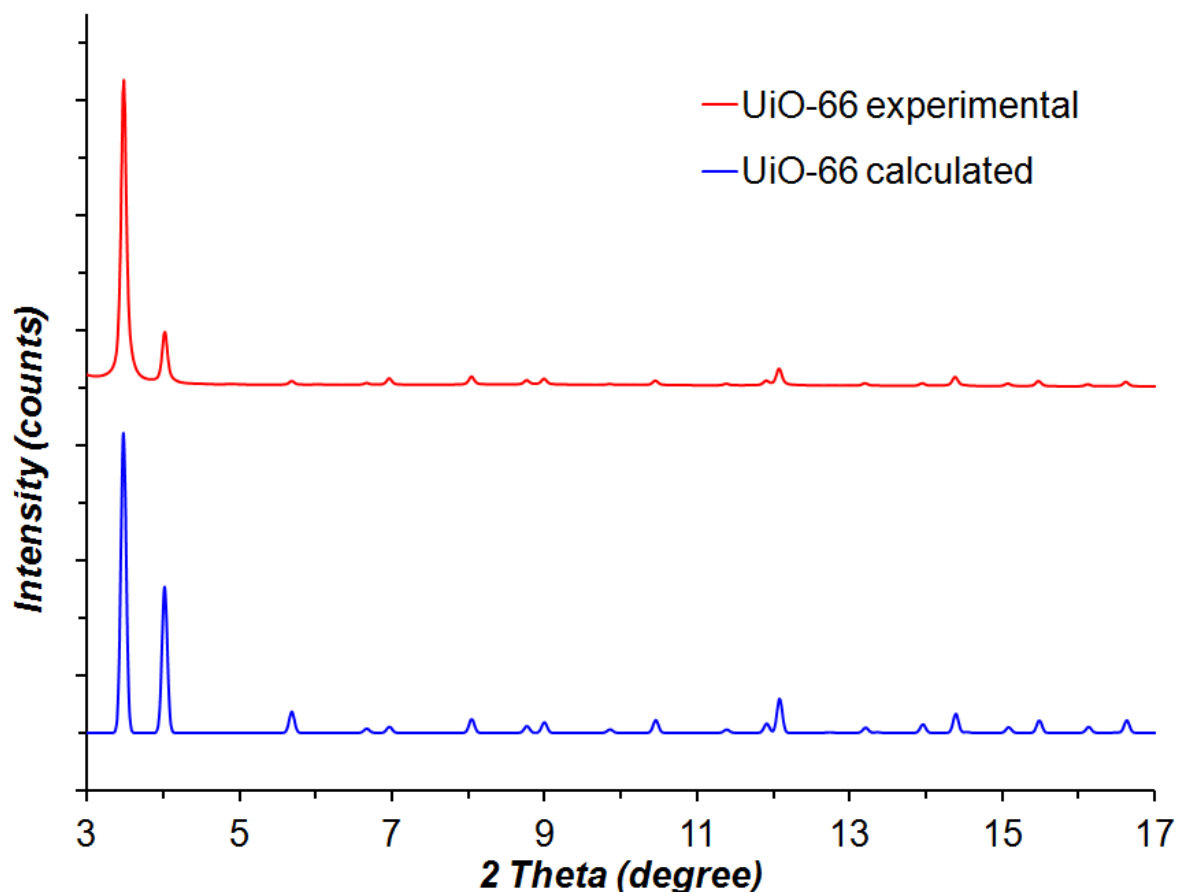

Figure S1. Experimental PXRD pattern of UiO-66 compared with the pattern calculated from the single crystal structure. No additional peaks indicate the purity of the sample.

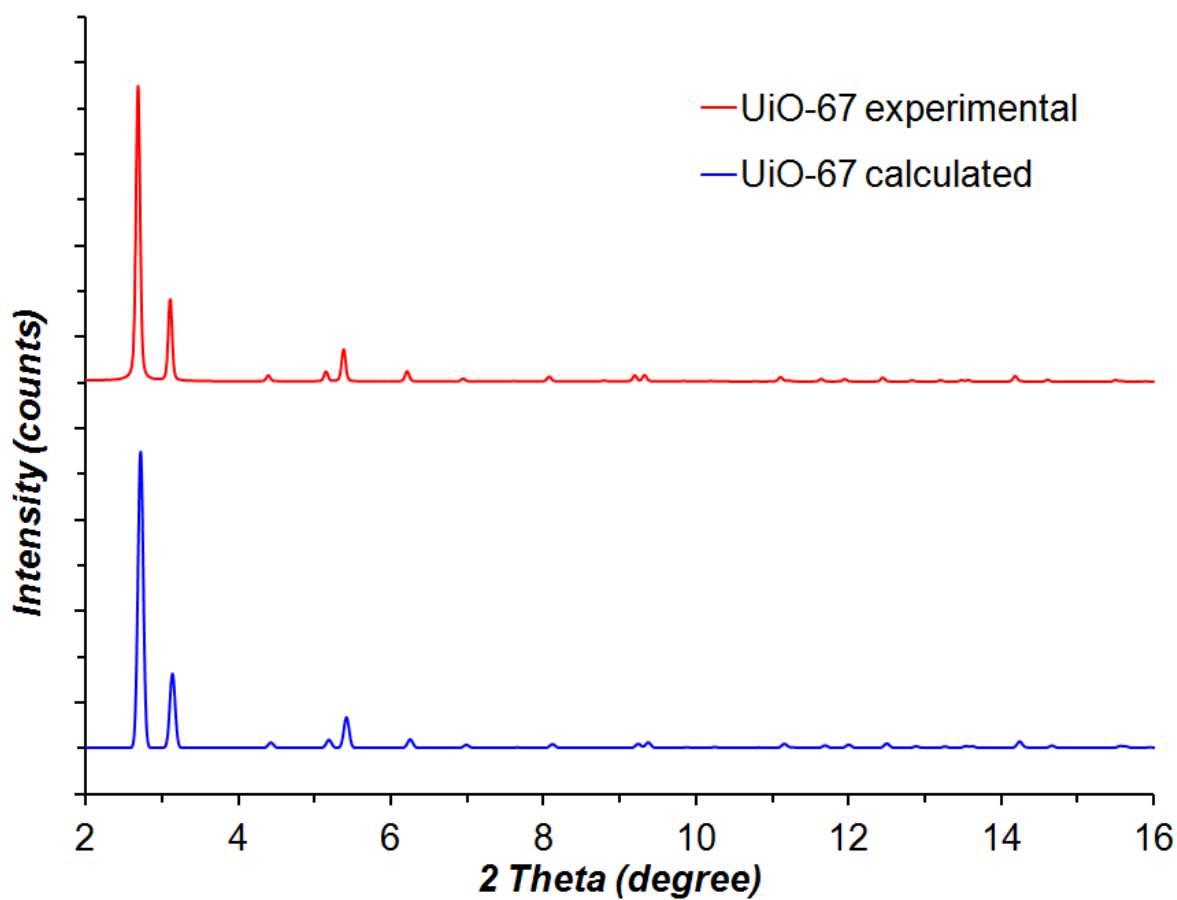

Figure S2. Experimental PXRD pattern of UiO-67 compared with the pattern calculated from the single crystal structure. No additional peaks indicate the purity of the sample.

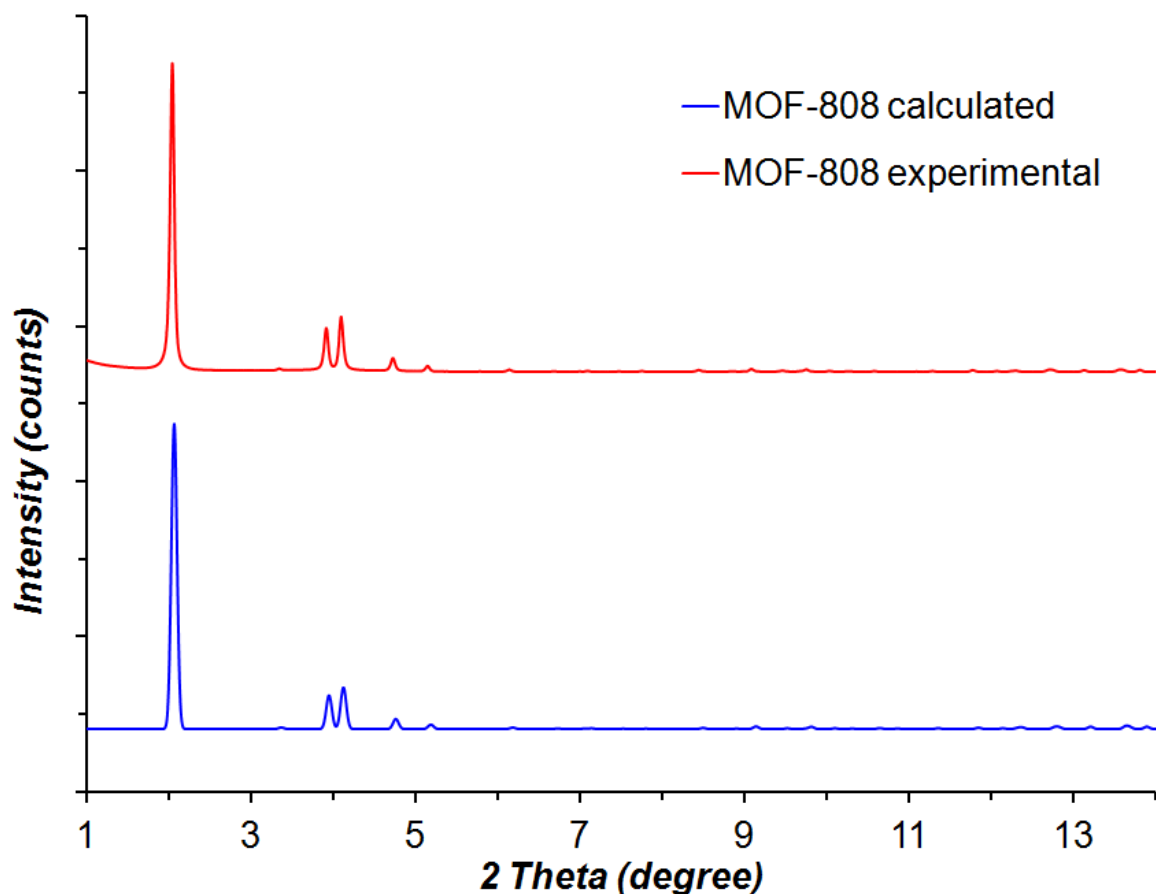

Figure S3. Experimental PXRD pattern of MOF-808 compared with the pattern calculated from the single crystal structure. No additional peaks indicate the purity of the sample.

Table S1. Unit cell parameters of UiO-66, UiO-67, MOF-808 from this study, compared with published results. Small differences in values arise from different temperatures of data collection.

| MOF     | this study                   |      | published                    |       |
|---------|------------------------------|------|------------------------------|-------|
|         | lattice parameter<br>$a$ (Å) | T(K) | lattice parameter<br>$a$ (Å) | T (K) |
| UiO-66  | 20.7582(6)                   | 298  | 20.7465(2) <sup>*</sup>      | 100   |
| UiO-67  | 28.845(1)                    | 298  | 26.783(3) <sup>**</sup>      | 100   |
| MOF-808 | 35.371(2)                    | 298  | 35.0764(10) <sup>***</sup>   | 100   |

<sup>\*</sup>1, <sup>\*\*</sup>2, <sup>\*\*\*</sup>3

## Section S2: Infrared band assignment for peaks in difference IR spectra of UiO-66, UiO-67, and MOF-808 upon DMMP exposure

The difference IR spectra of UiO-66, UiO-67, and MOF-808 were recorded by a Bruker IFS 66v/S spectrometer. The clean, pre-exposed MOFs were used as the background. The difference IR spectra of UiO-66 upon DMMP exposure can be found in Figure 3, while Figure S4 shows the difference IR spectra of UiO-67 (Black) and MOF-808 (Red). The assignments for the IR bands in the difference spectra are shown in Table S2.

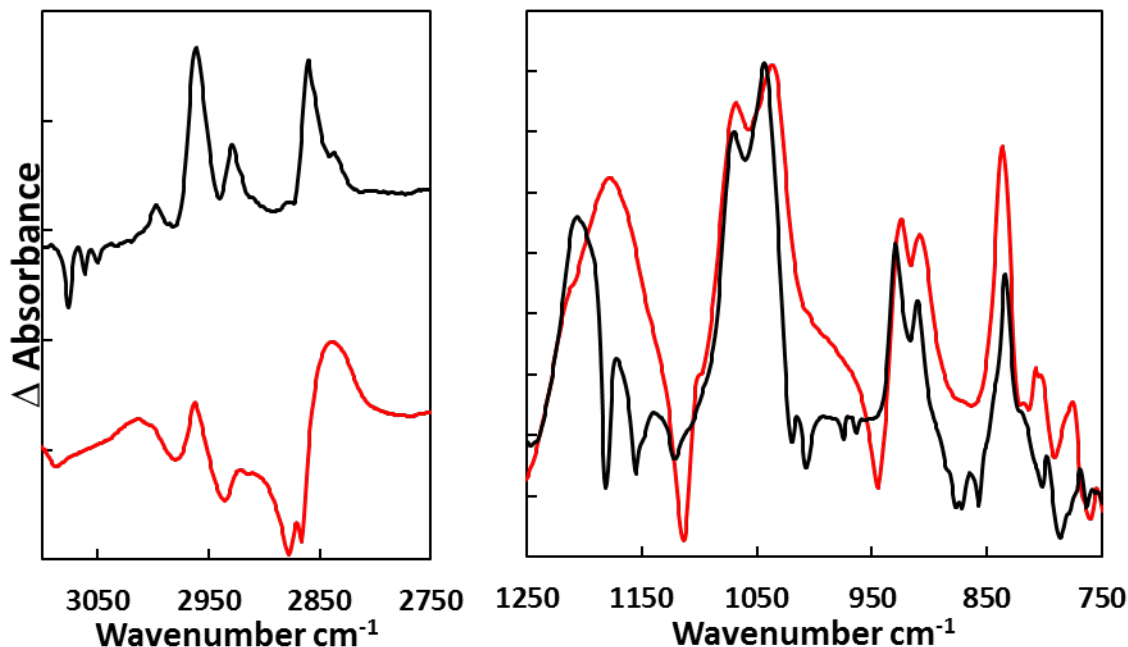

Figure S4. Difference IR spectra of MOF-808(Red) and UiO-67 (Black) upon DMMP exposure at room temperature (298 K)

Table S2. Observed vibrational frequencies ( $\text{cm}^{-1}$ ) in difference IR spectra of  $\text{Zr}_6$  MOFs upon DMMP exposure and their assignments.<sup>4</sup>

| Mode                                                                                       | UiO-66-DMMP<br>$\text{cm}^{-1}$ | UiO-67-DMMP<br>$\text{cm}^{-1}$ | MOF-808-DMMP<br>$\text{cm}^{-1}$ |
|--------------------------------------------------------------------------------------------|---------------------------------|---------------------------------|----------------------------------|
| $\nu(\text{ZrO-H})_{\text{SBU, H-bounded}}$                                                | 3313                            |                                 |                                  |
| $\nu_{\text{as}}(\text{CH}_3)$                                                             | 3009                            | 2997                            | 3012                             |
| $\nu_{\text{as}}(\text{CH}_3\text{O})$                                                     | 2950                            | 2961                            | 2962                             |
| $\nu_{\text{s}}(\text{CH}_3)$                                                              | 2950sh                          | 2961sh                          | 2962sh                           |
| $\nu_{\text{as}}(\text{ZrOCH}_3)$                                                          |                                 | 2928                            | 2913                             |
| $\nu_{\text{s}}(\text{CH}_3\text{O})$                                                      | 2846                            | 2860                            | 2839                             |
| $\nu_{\text{s}}(\text{ZrOCH}_3)$                                                           |                                 | 2836                            | 2839sh                           |
| $\delta(\text{PCH}_3)+\delta(\text{P=O})+\nu_{\text{as}}(\text{O-P-O})+\rho(\text{OCH}_3)$ |                                 |                                 | 1178                             |
| $\delta(\text{PCH}_3)$                                                                     | 1308                            | 1207                            |                                  |
| $\nu(\text{P=O})$                                                                          | 1255                            | 1171                            |                                  |
| $\nu_{\text{as}}(\text{O-P-O})+\rho(\text{OCH}_3)$                                         | 1186                            | 1138                            |                                  |
| $\nu_{\text{s}}(\text{O-P-O})$                                                             | 1064sh                          | 1070sh                          | 1068sh                           |
| $\nu_{\text{as}}(\text{CO})$                                                               | 1064                            | 1070                            | 1068                             |
| $\nu_{\text{s}}(\text{CO})$                                                                | 1048                            | 1043                            | 1038                             |
| $\rho(\text{PCH}_3)_{\text{P=O bounded to SBU}}$                                           | 952                             | 926                             | 925                              |
| $\rho(\text{PCH}_3)$                                                                       | 912                             | 910                             | 909                              |
| $\nu(\text{P-C})$                                                                          | 819                             | 834                             | 837                              |
| $\nu(\text{P-O})$                                                                          | 789                             | 819                             | 775                              |

$\nu$ : bond stretching,  $\rho$ : rocking (in plane),  $\delta$ : angle bending

**Section S3: DFT calculations to accompany DMMP-Zr<sub>6</sub> MOF overall reaction pathway calculations**

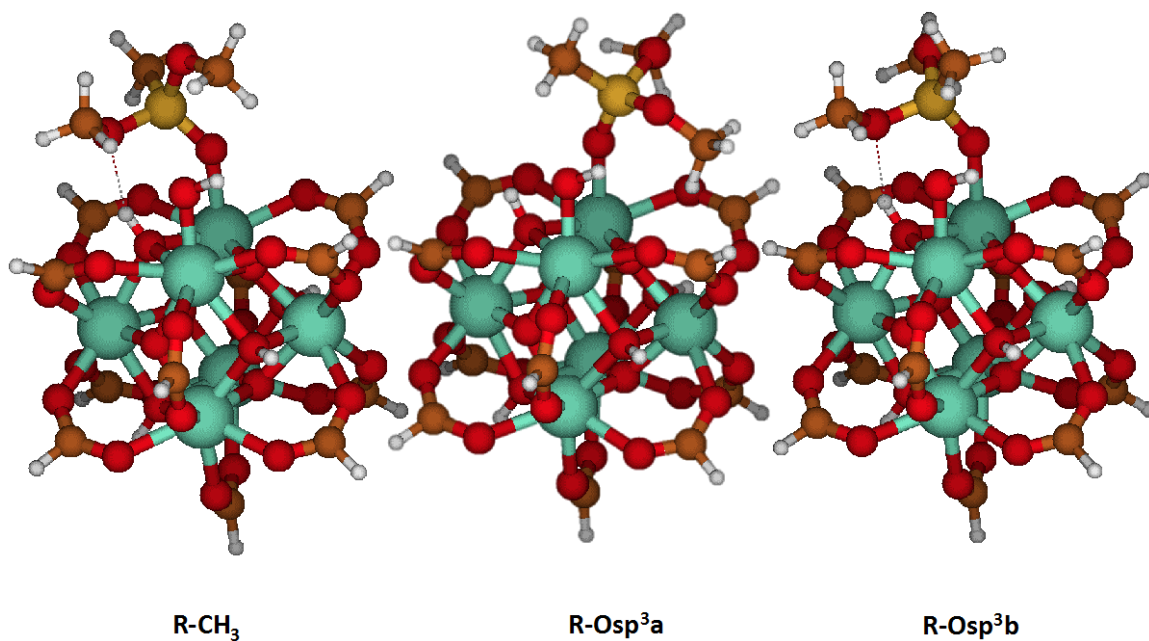

**Figure S5.** Three possible reactive orientations of DMMP with respect to the Zr-OH group at a missing linker defect of UiO-67. The reaction pathway for the R-CH<sub>3</sub> orientation is shown in Figs. 10 and 11, and those for R-Osp<sup>3</sup>a and b are in Figs. S7-S9.

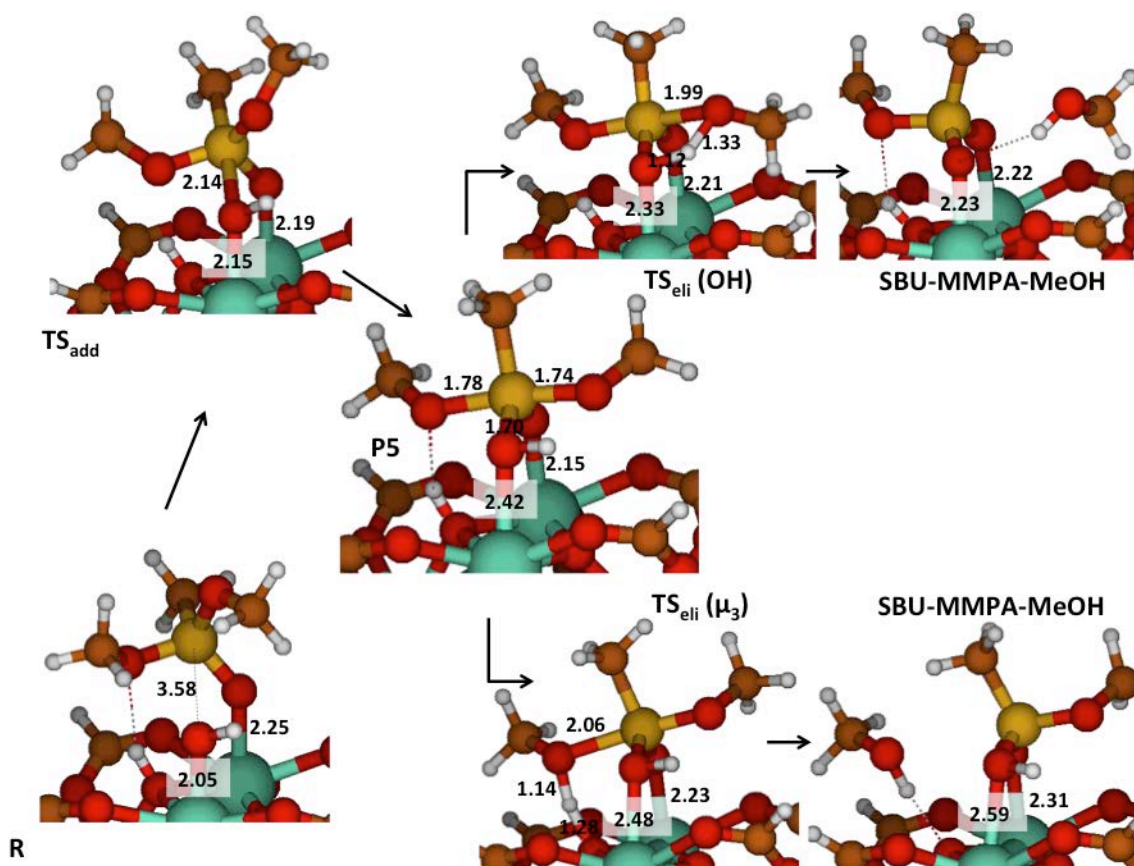

**Figure S6.** Selected bond distances in the central stationary points of the decomposition of DMMP with a defective SBU of UiO-67 along the approach in which the P-CH<sub>3</sub> bond of DMMP is collinear to the forming P-OH bond at the addition transition state. Same color code as Fig. 11.



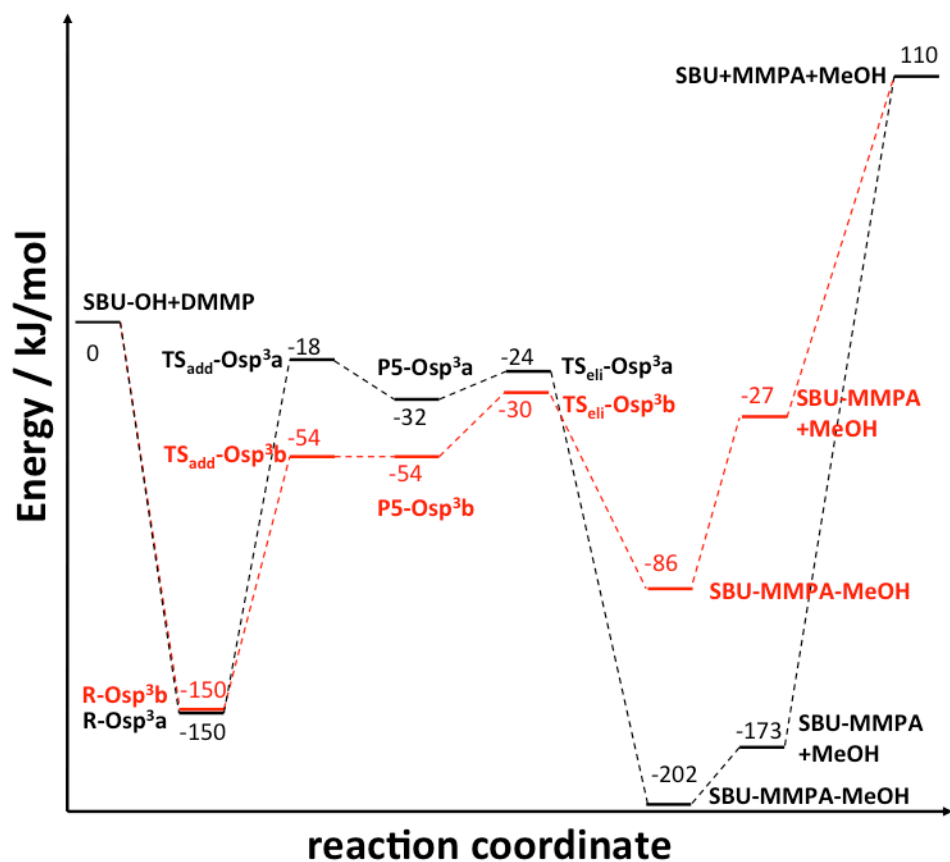

**Figure S7.** Potential-energy profile for the reaction of DMMP with a defective SBU of UiO-67 along the approaches in which the P–OCH<sub>3</sub> bond of DMMP is collinear to the forming P–OH bond at the addition transition state

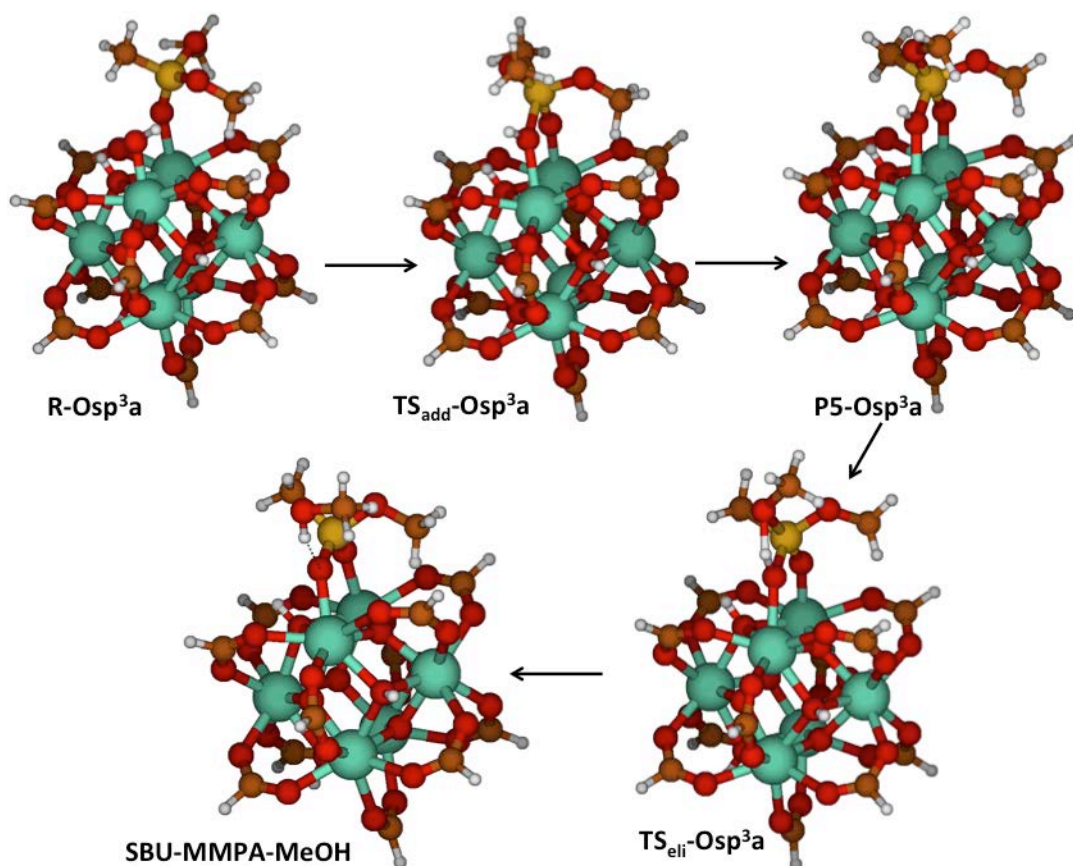

**Figure S8.** Geometries of the central stationary points in the decomposition of DMMP with a defective SBU of UiO-67 along the “Osp3a” approach in Fig. S7. Same color code as Fig. 11.

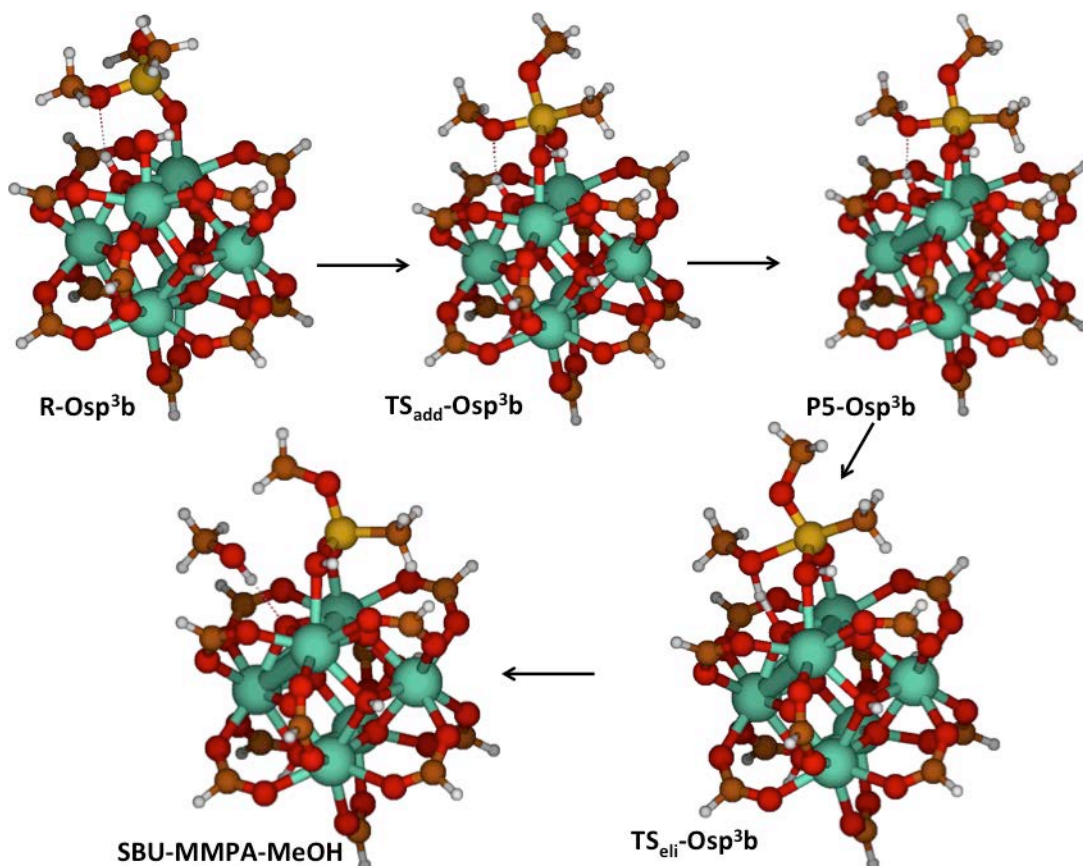

**Figure S9.** Geometries of the central stationary points in the decomposition of DMMP with a defective SBU of UiO-67 along the “Osp3b” approach in Fig. S7. Same color code as Fig. 11.

1. Øien, S.; Wragg, D.; Reinsch, H.; Svelle, S.; Bordiga, S.; Lamberti, C.; Lillerud, K. P., Detailed Structure Analysis of Atomic Positions and Defects in Zirconium Metal–Organic Frameworks. *Crystal Growth & Design* **2014**, *14*, 5370-5372.
2. Ko, N.; Hong, J.; Sung, S.; Cordova, K. E.; Park, H. J.; Yang, J. K.; Kim, J., A Significant Enhancement of Water Vapour Uptake at Low Pressure by Amine-Functionalization of UiO-67. *Dalton Transactions* **2015**, *44*, 2047-2051.
3. Furukawa, H.; Gandara, F.; Zhang, Y. B.; Jiang, J. C.; Queen, W. L.; Hudson, M. R.; Yaghi, O. M., Water Adsorption in Porous Metal-Organic Frameworks and Related Materials. *J. Am. Chem. Soc.* **2014**, *136*, 4369-4381.
4. Gordon, W. O.; Tissue, B. M.; Morris, J. R., Adsorption and Decomposition of Dimethyl Methylphosphonate on Y2O3 Nanoparticles. *J. Phys. Chem. C* **2007**, *111*, 3233-3240.
